# Supplementary material for: The Tudor Domain-Containing Protein, Kotsubu (CG9925), Localizes to the Nuage and Functions in piRNA Biogenesis in D. melanogaster
Source: PubMed Central journal article supplement (PMC9002060; doi:10.3389/fmolb.2022.818302), 2022-03-29

A

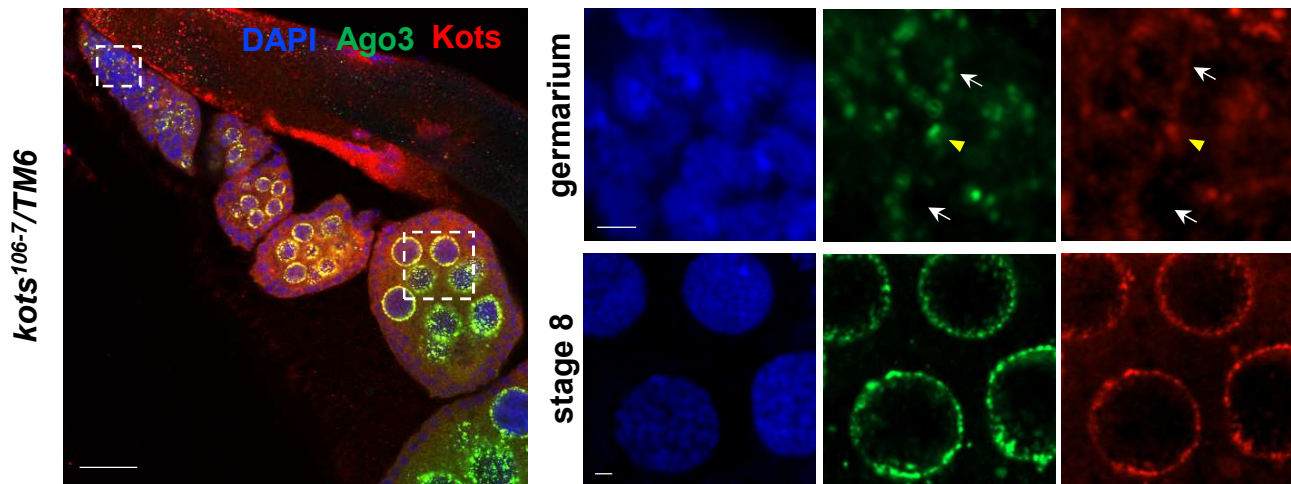

B

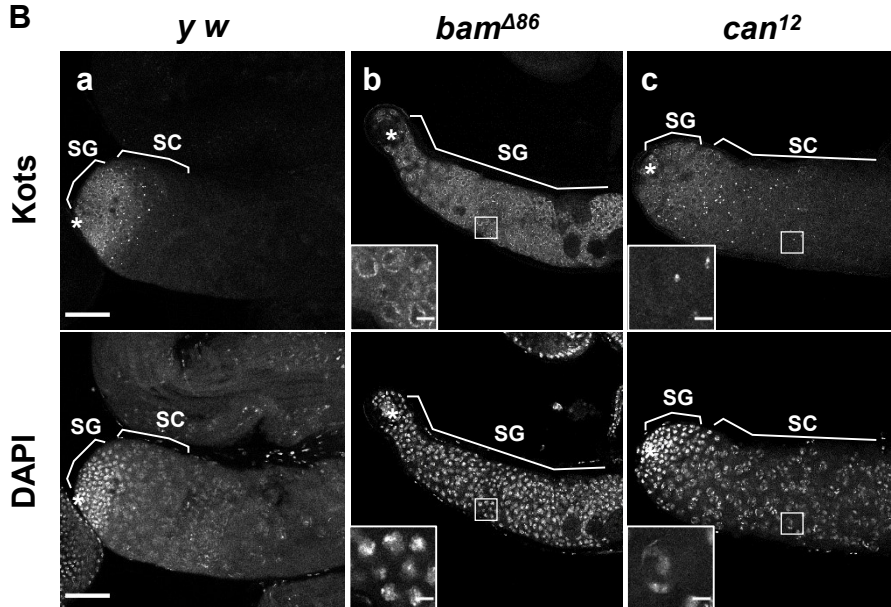

D

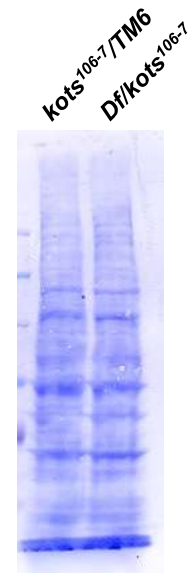

C

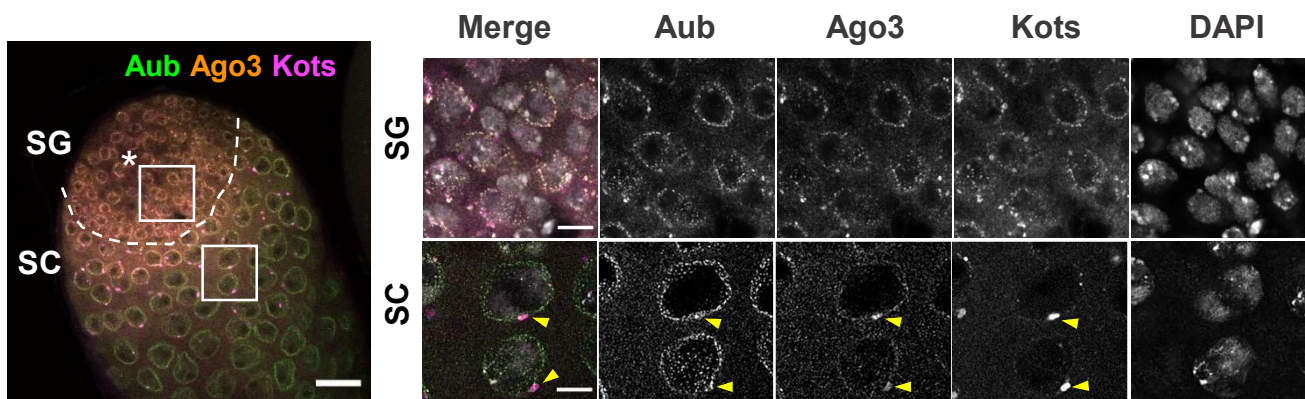

**A**

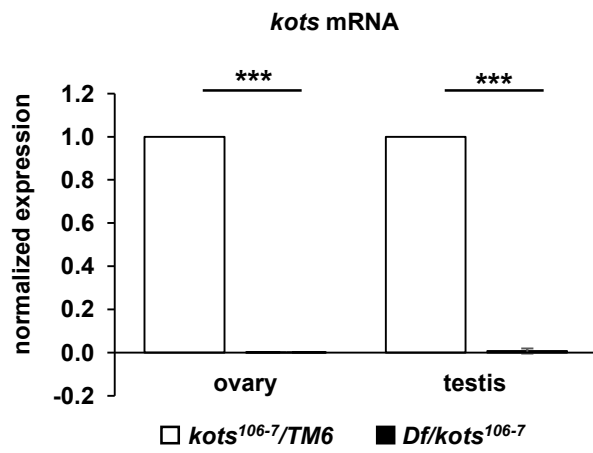

**C**

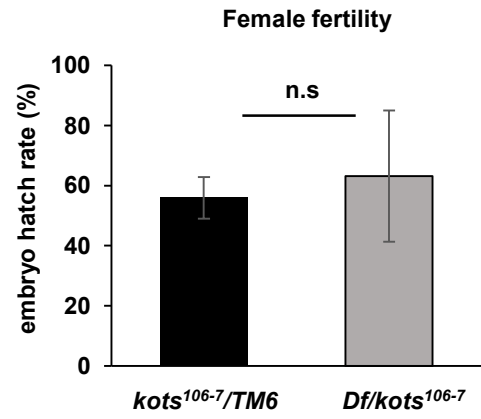

**B**

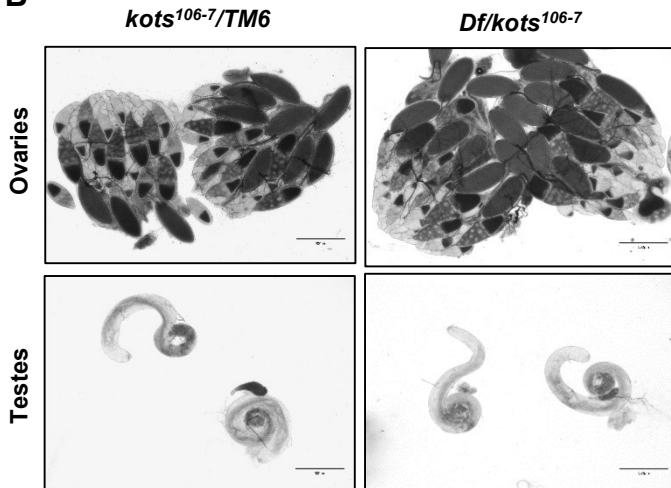

**D**

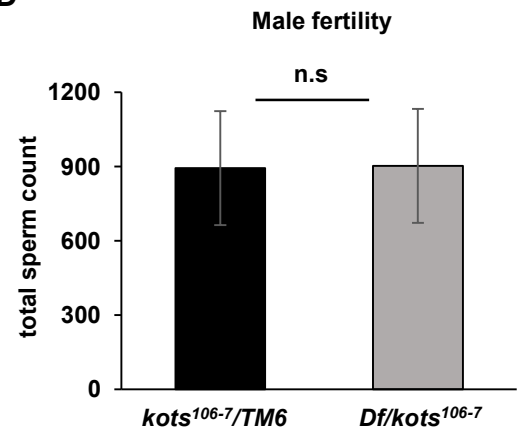

## Pipeline for small-RNA-seq analysis

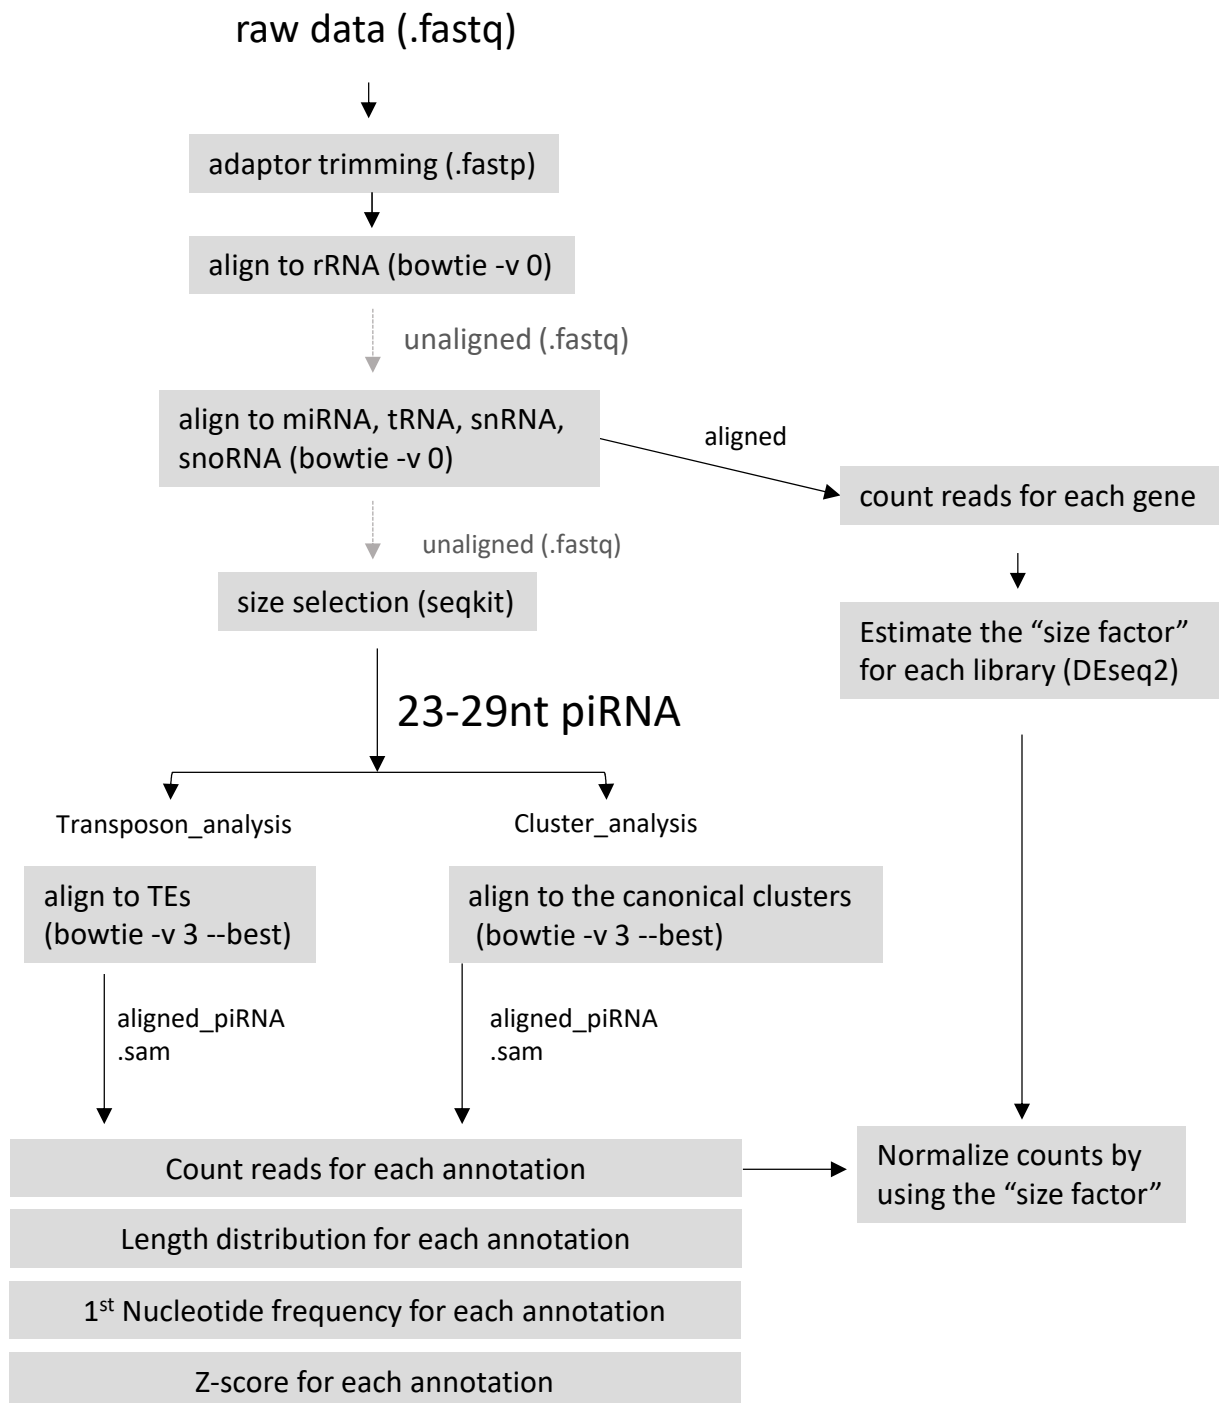

## Ovary

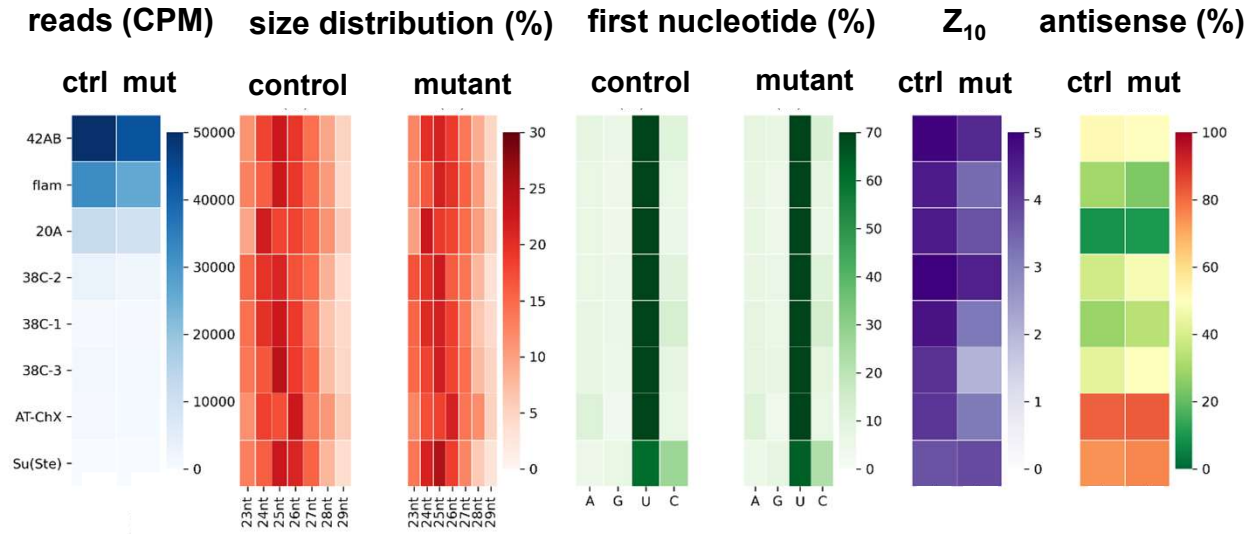

## Testis

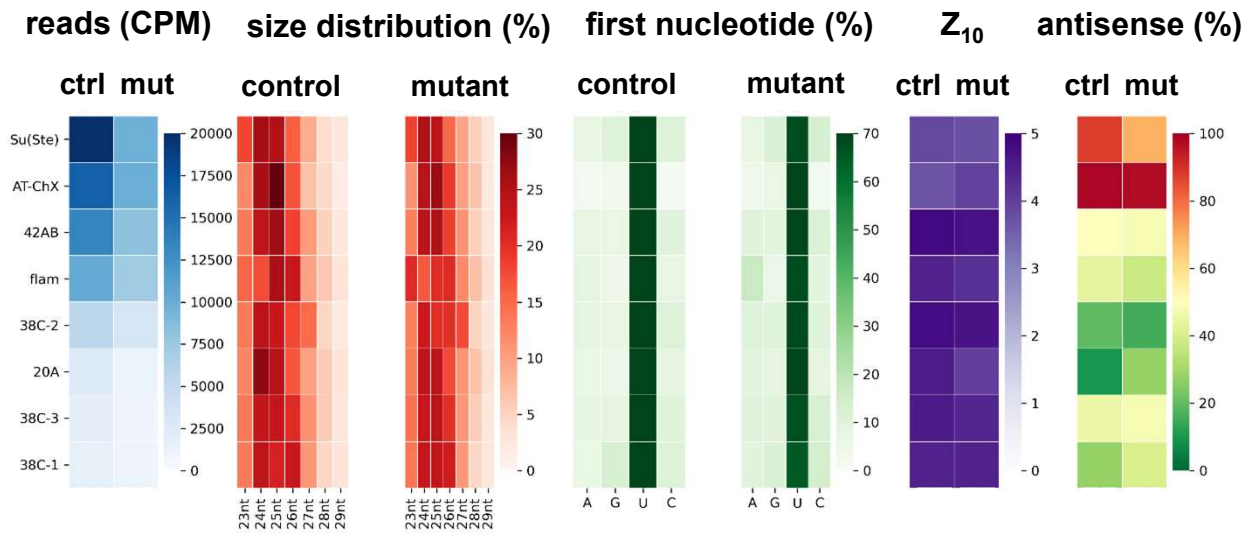

# Figure S4B

## control ovary

## mutant ovary

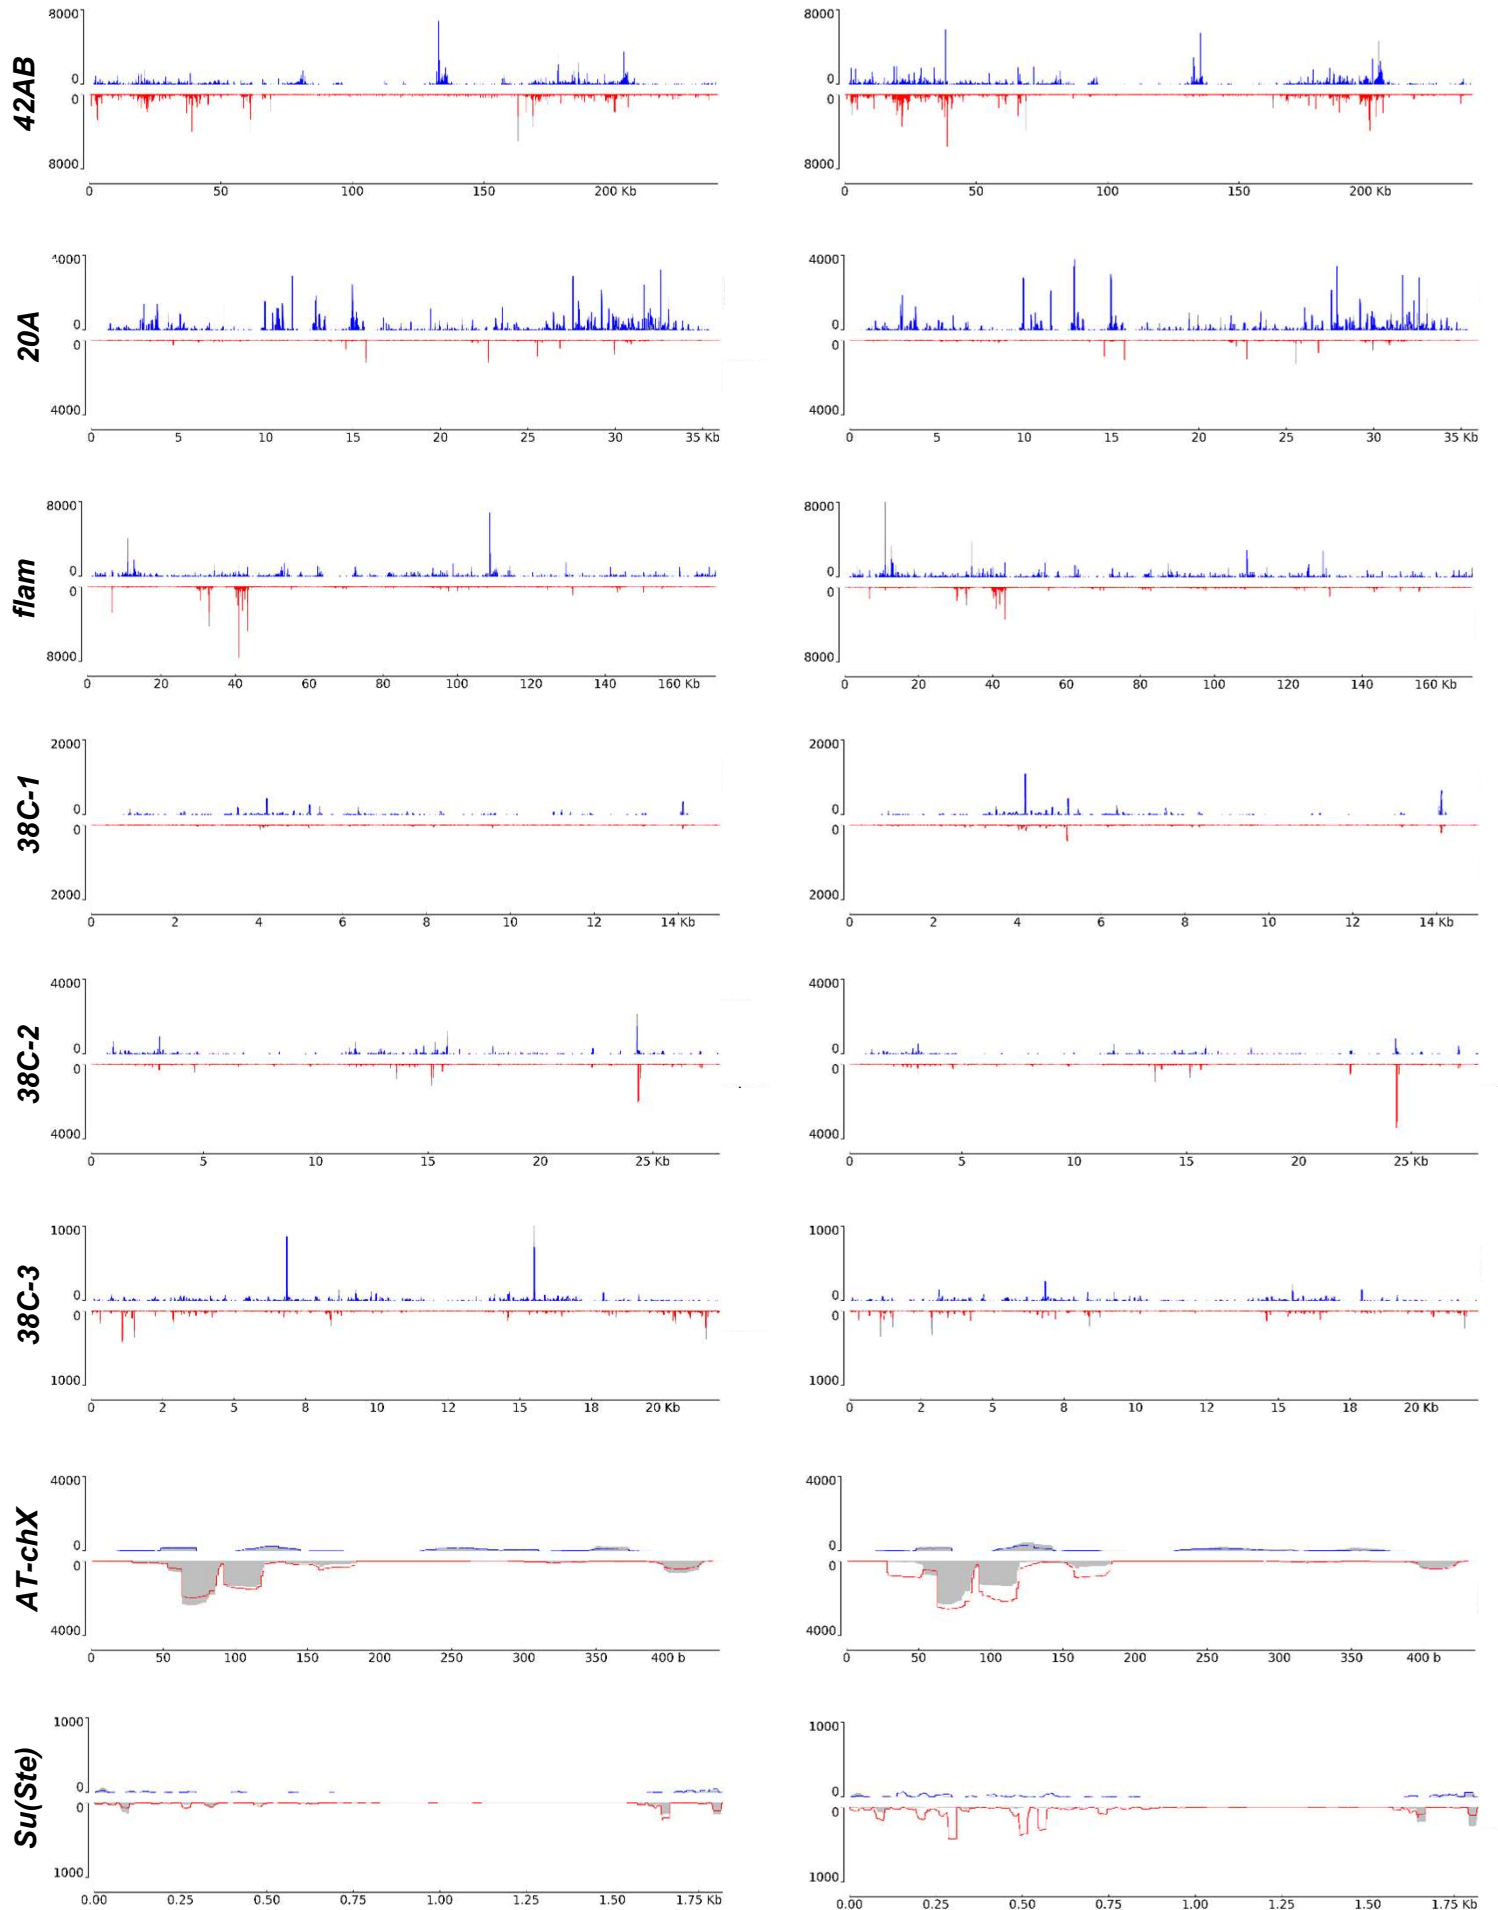

## control testis

## mutant testis

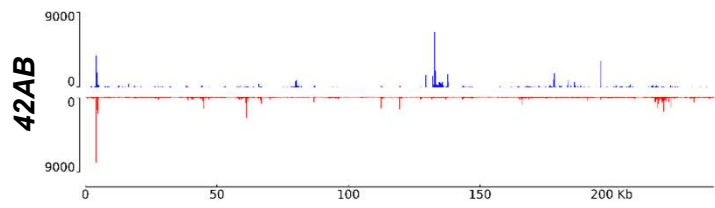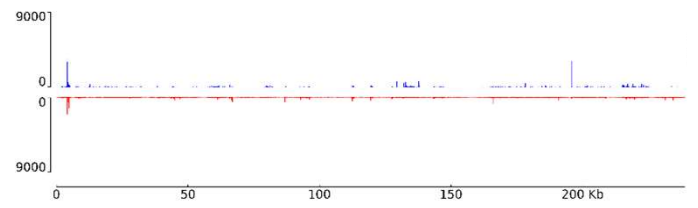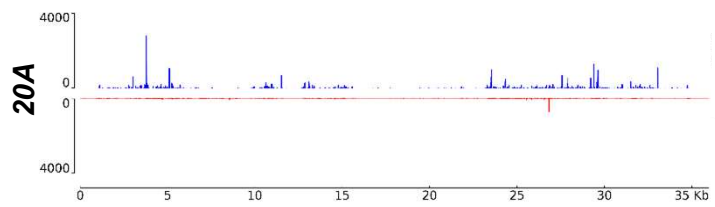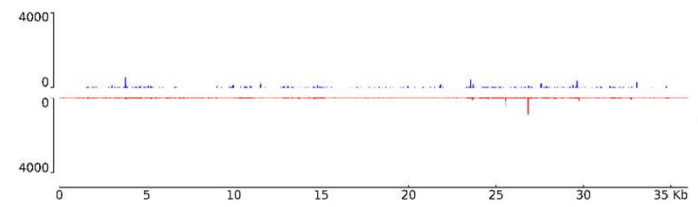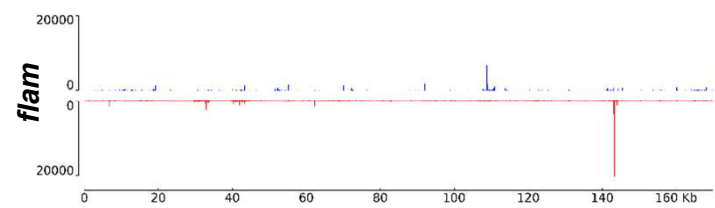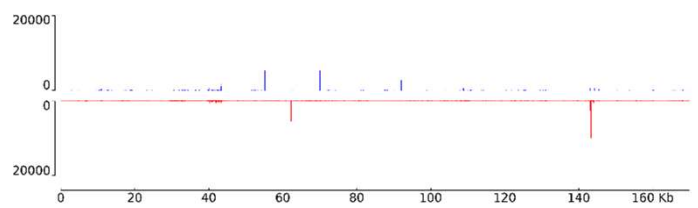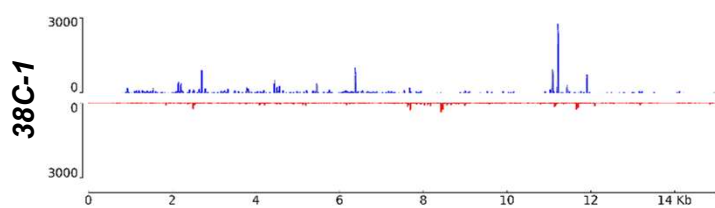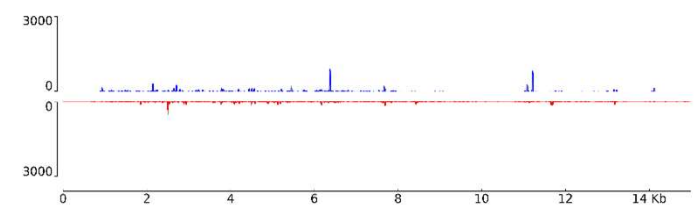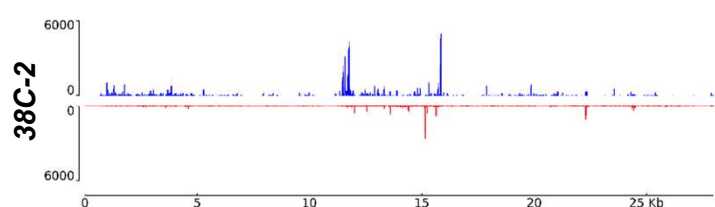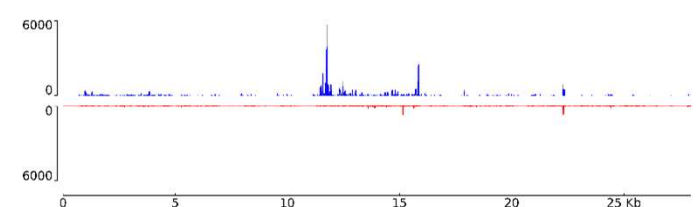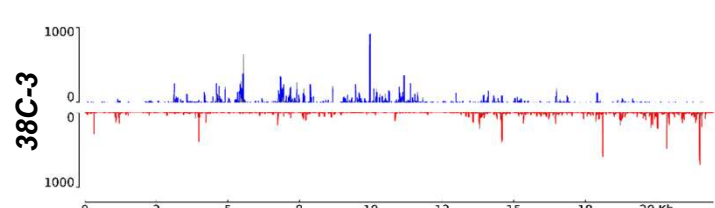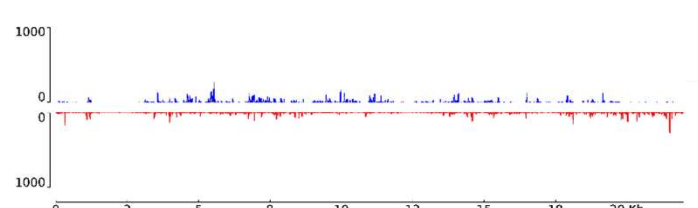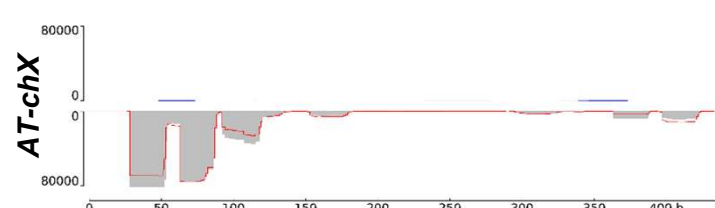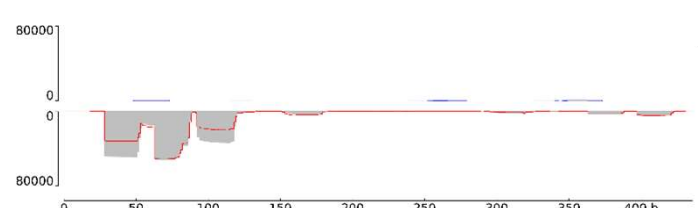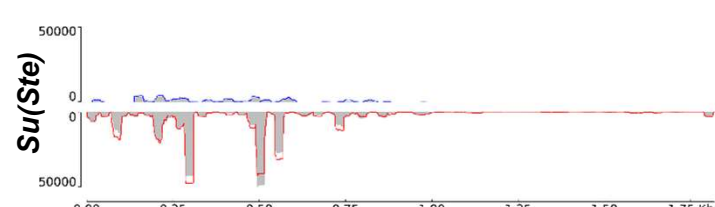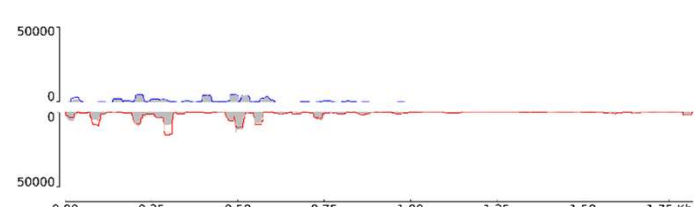

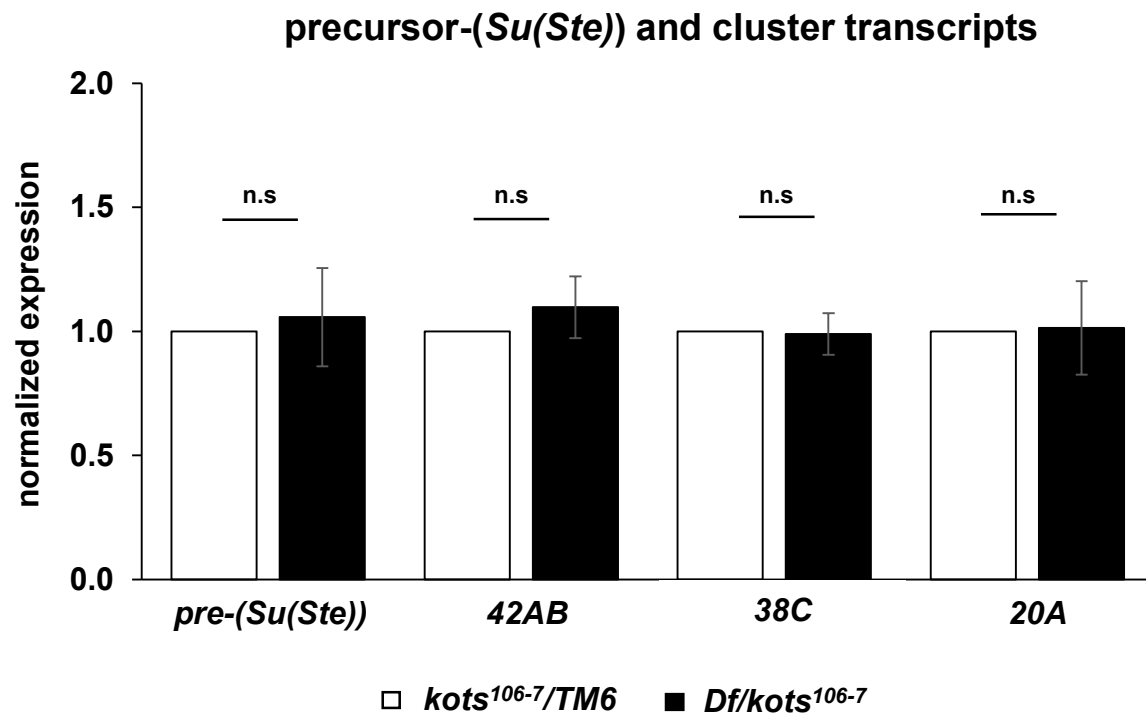

# Figure S5A

## Ovary

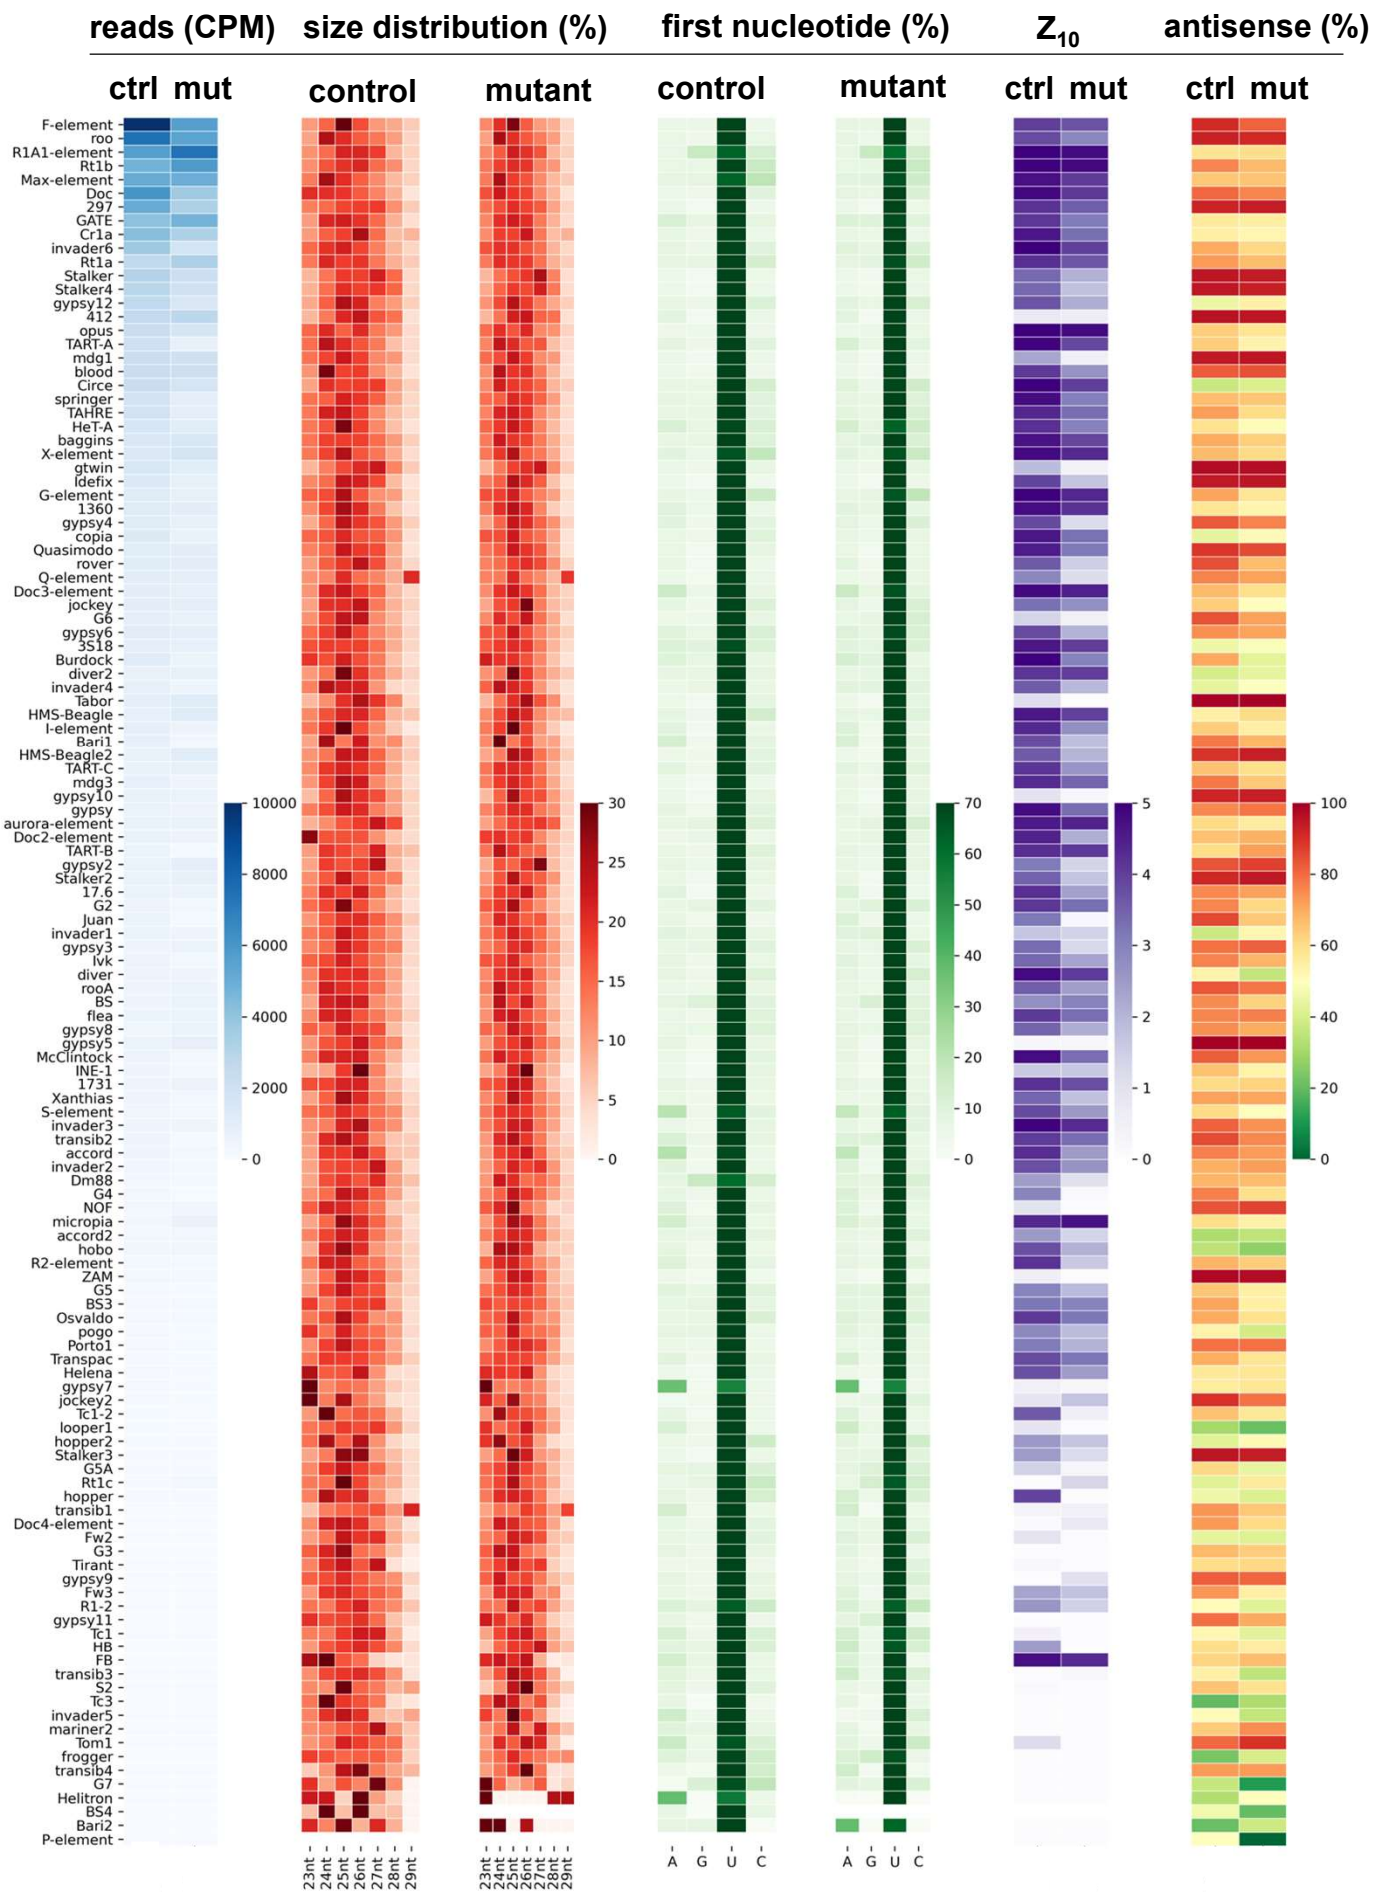



# Figure S5B

## Testis

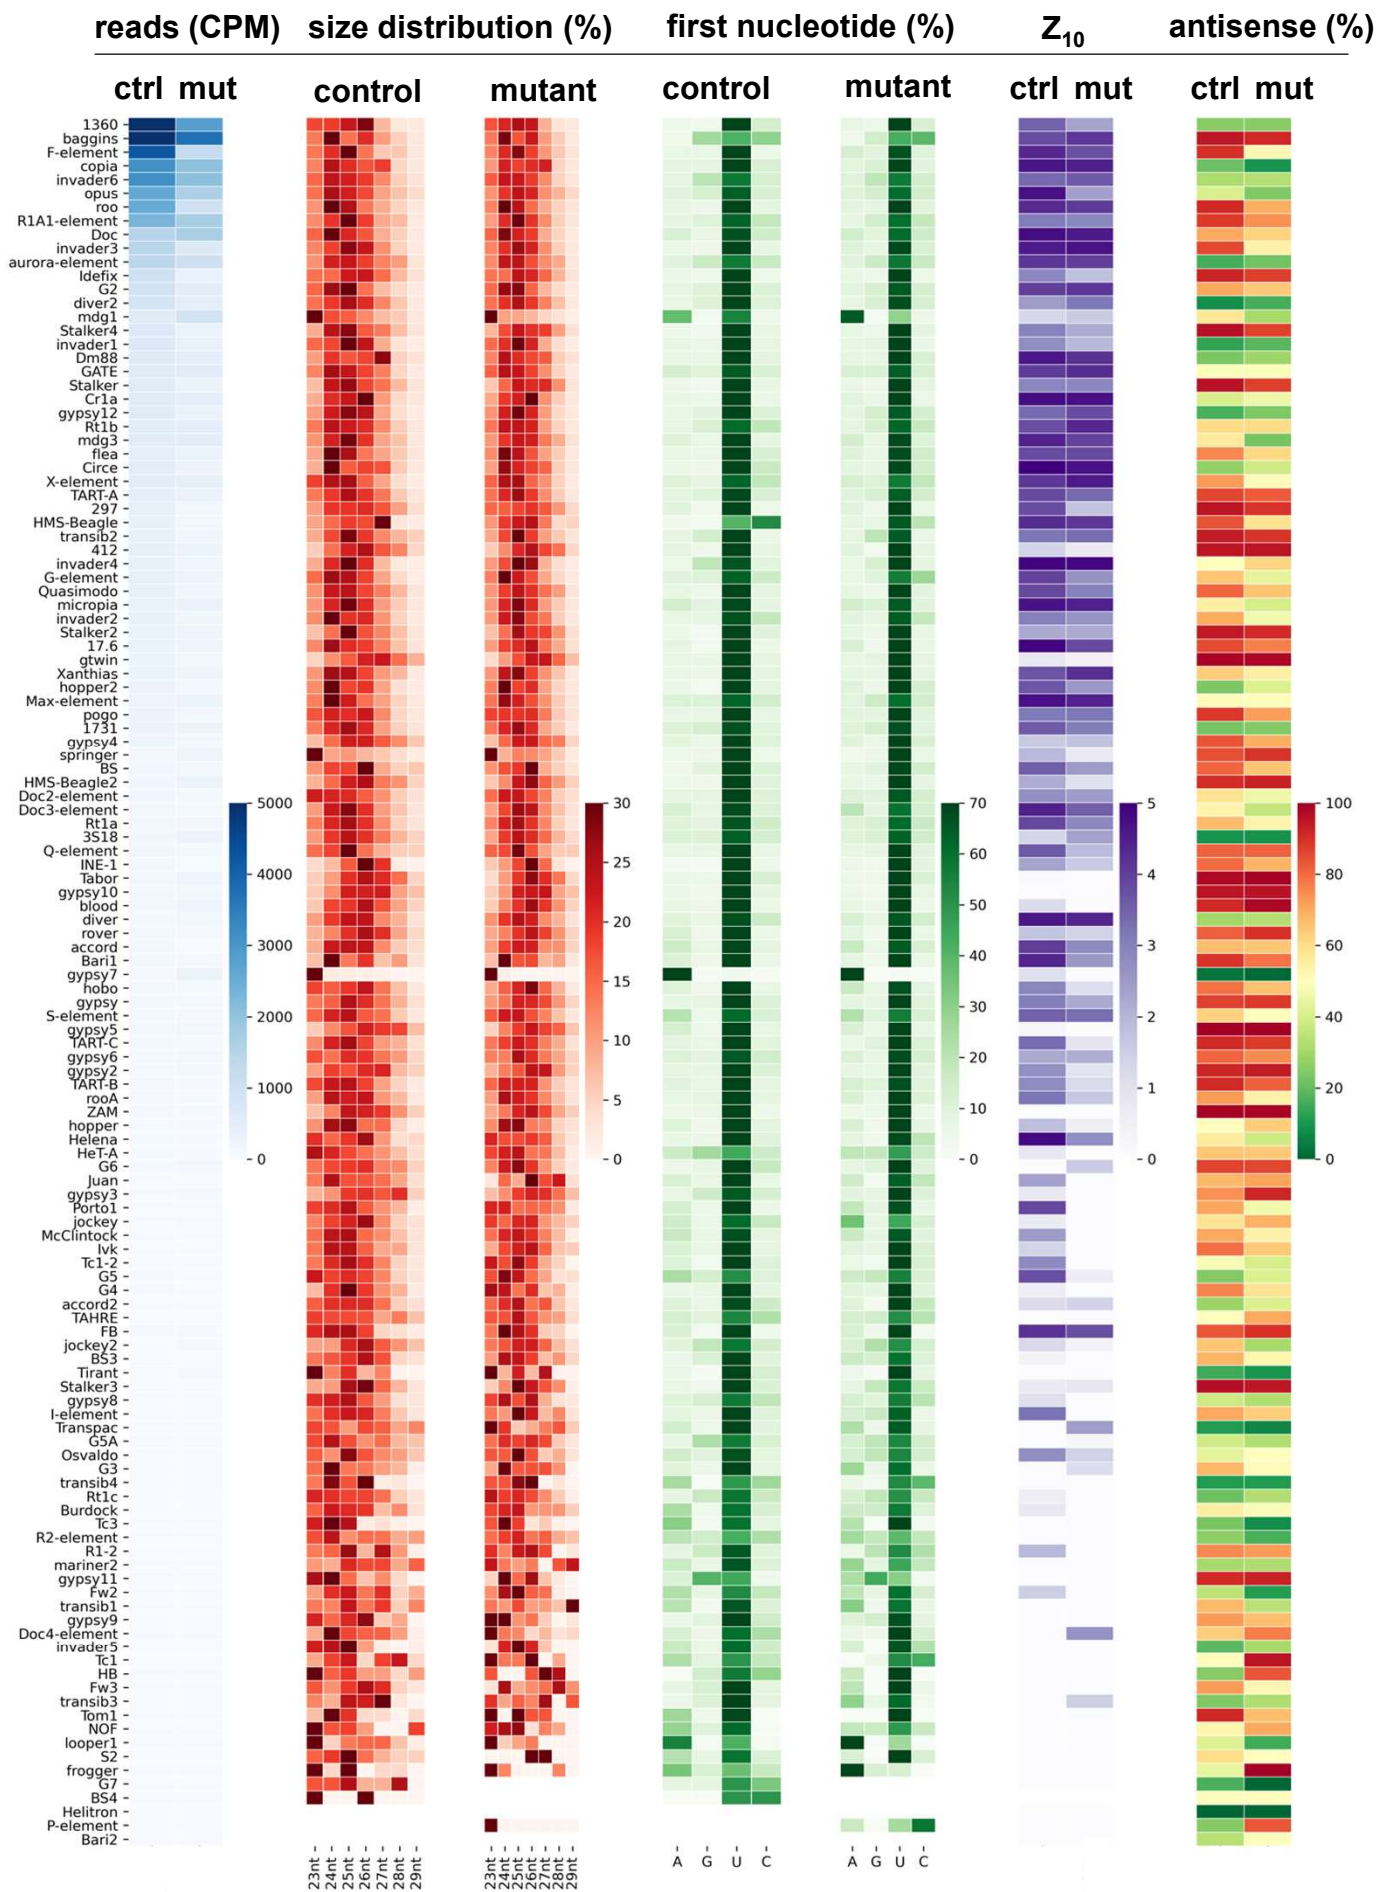

# Figure S6

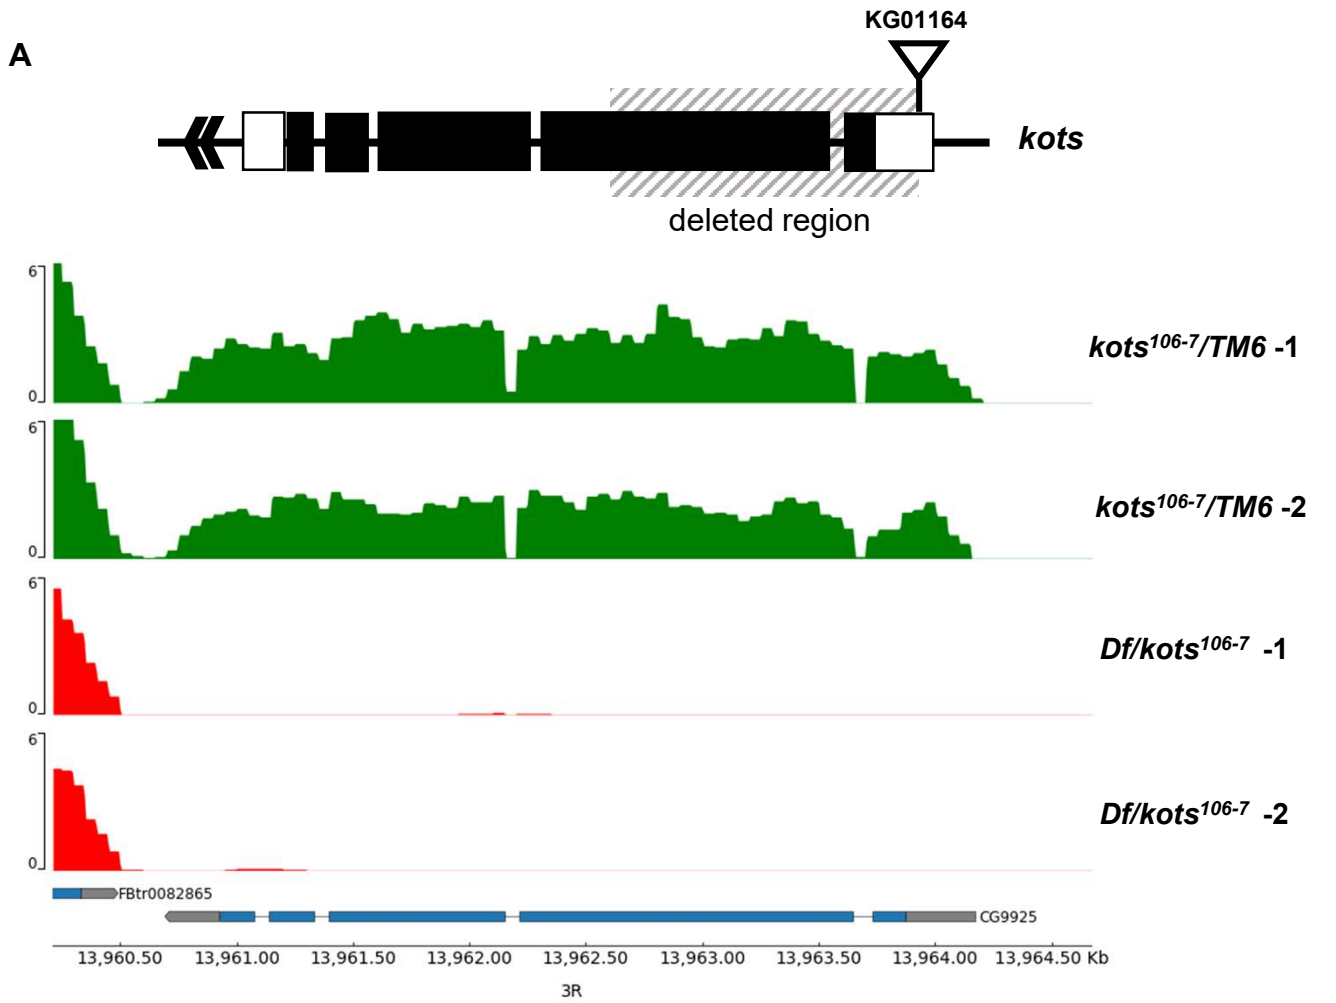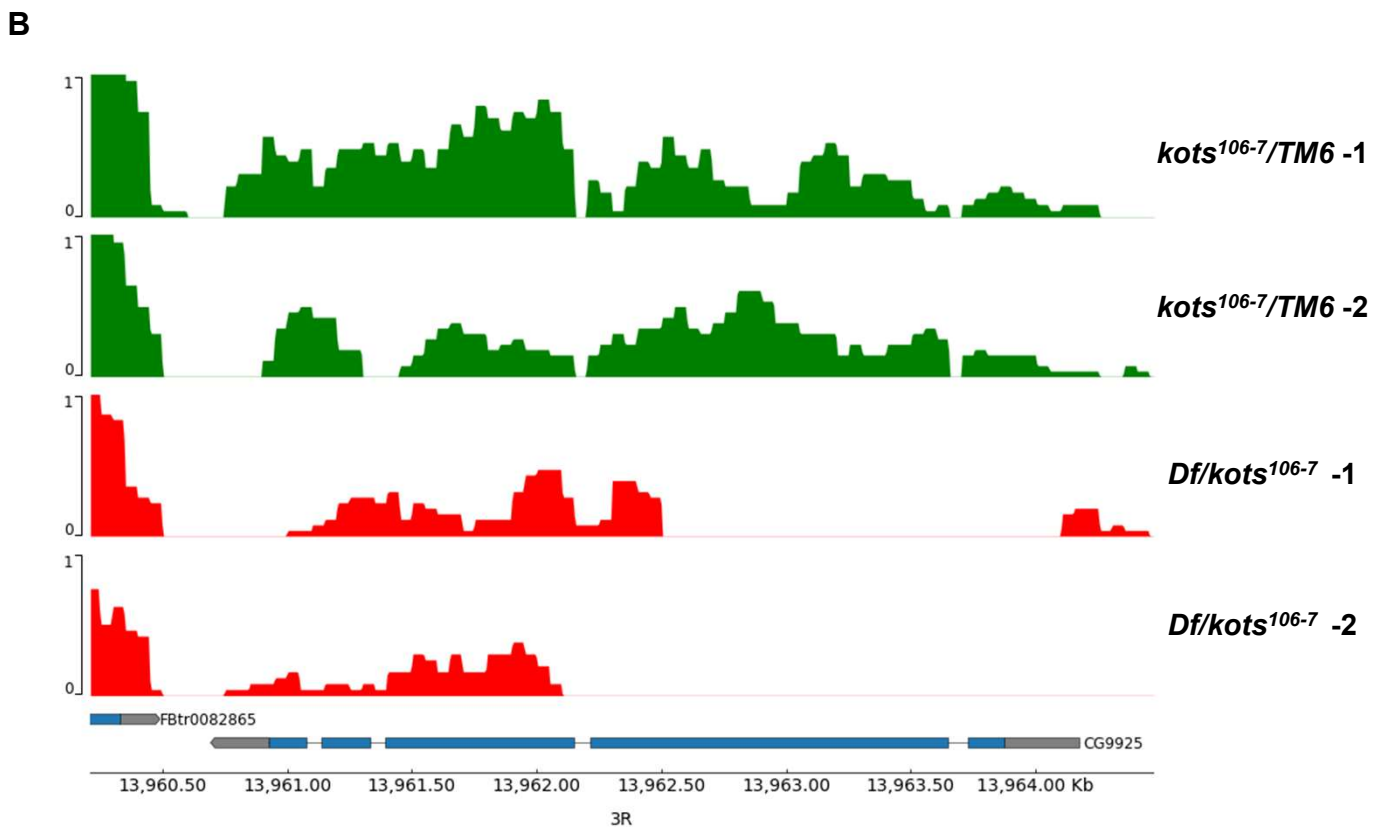

# Figure S7

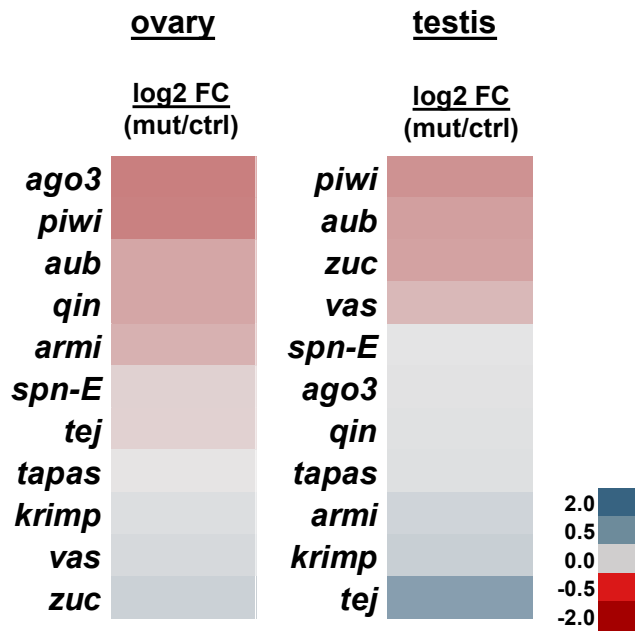

## A

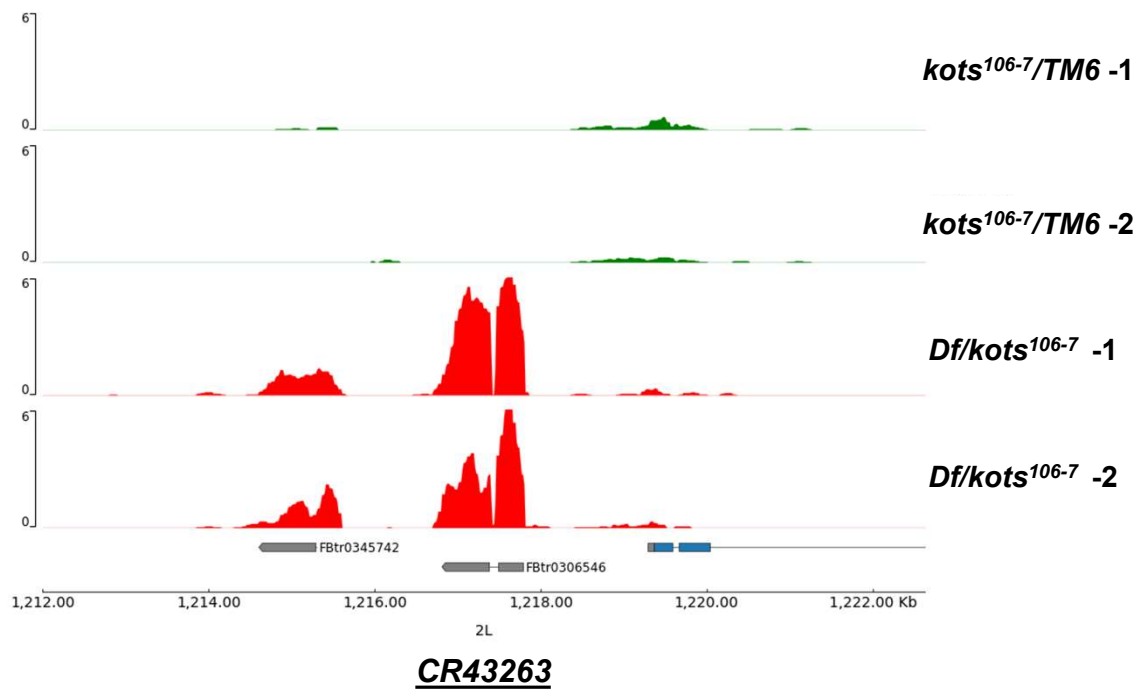

## B

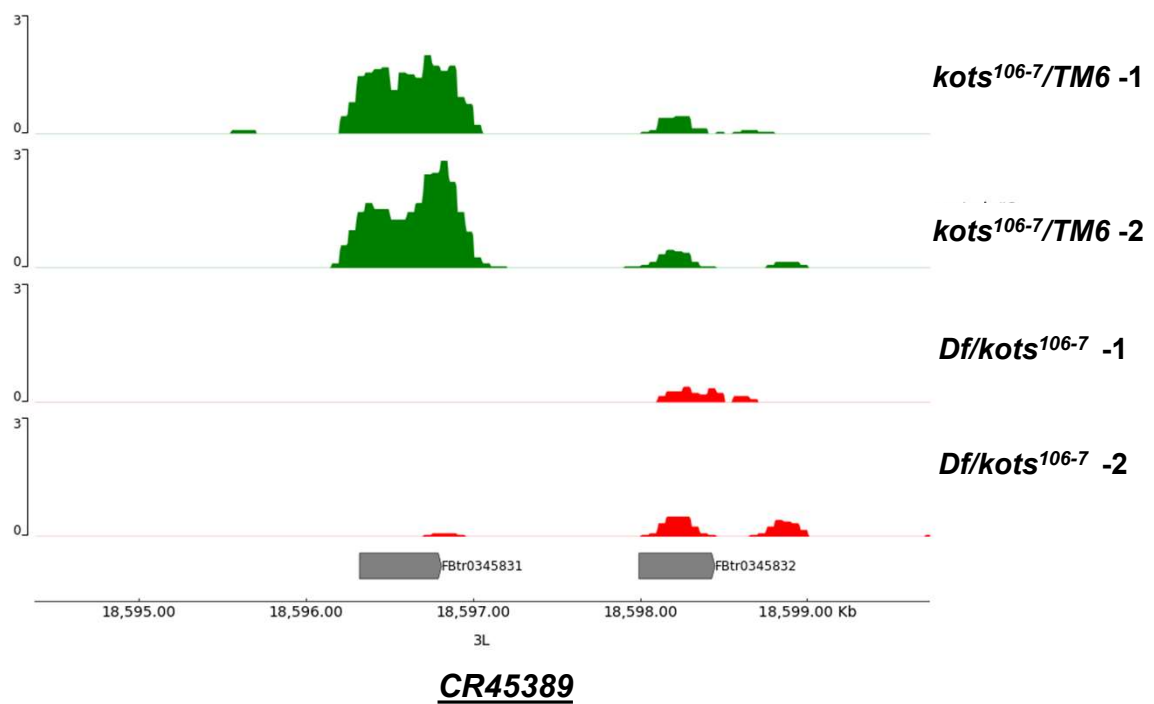

Supplement: Presentation1.pdf [file Presentation1.pdf]
